# Supplementary material for: Dnmt1 has an essential function despite the absence of CpG DNA methylation in the red flour beetle Tribolium castaneum
Source: PubMed Central journal article supplement (PMC6220294; doi:10.1038/s41598-018-34701-3), 2018-11-07
Supplement: 41598_2018_34701_MOESM1_ESM.pdf [file 41598_2018_34701_MOESM1_ESM.pdf]

## ***Dnmt1* has an essential function despite the absence of CpG DNA methylation in the red flour beetle**

***Tribolium castaneum***

Nora KE Schulz, C Isabel Wagner, Julia Ebeling, Günter Raddatz, Maike F Diddens-de Buhr, Frank Lyko,  
Joachim Kurtz

### Supplement

Table S 1 Primer sequences for RT qPCR (with efficiencies) and RNAi including information about size and location.

| Gene           | NCBI reference | Primer pair (5' – 3')                                   | Fragment length (bp) | Location (start – end bp)   | Efficiency     | Primer origin    |
|----------------|----------------|---------------------------------------------------------|----------------------|-----------------------------|----------------|------------------|
| <b>RT qPCR</b> |                |                                                         |                      |                             |                |                  |
| <i>Dnmt1</i>   | XM_008195236   | f: caagggcagtgatacacc<br>r: cgcaggctctcttgatct          | 185                  | Exon 11 – 12<br>(3520-3704) | 1.89<br>(95%)  | This study       |
| <i>rp49</i>    | XM_964471      | f: ttatggcaaaactcaaacgcaac<br>r: ggtagcatgtgctctgtttg   | 132                  | Exon 2 – 3<br>(184-315)     | 1.98<br>(99%)  | (1.)             |
| <i>rpl13a</i>  | XM_969211      | f: ggccgcaagtctgtcac<br>r: ggtgaatggagccactgtt          | 186                  | Exon 4 – 5<br>(488-673)     | 2.00<br>(100%) | (2.)             |
| <b>RNAi</b>    |                |                                                         |                      |                             |                |                  |
| <i>Dnmt1</i>   | XM_008195236   | f: gcgagaaagtcttactgggg<br>r: cgcggctgaaattgcttagt      | 153                  | Exon 3<br>(542-694)         | NA             | This study       |
|                |                | f: acgacacgggcattttactc<br>r: tcctctttcgcatcatcg        | 580                  | Exon 5-7<br>(1340-1918)     | NA             | iB_08496<br>(3.) |
| <i>asnA</i>    | NC_000913.3    | f: atggtggcggcaatacgtggatc<br>r: gattactccatcgagaagctgc | 304                  | 442-768                     | NA             | (4.)             |

1. Konopova B, Jindra M. *Proc. Nat. A. Sci. USA.* 2007;104:10488-93.
2. Peuß R et al. *Proc R Soc B.* 2015;282(1819).
3. obtained from EupheriaBiotech ( <http://2018.eupheria.net/> )
4. Peuß R et al. *R. Soc. open sci.* 2016;3(160138).

Table S 2 RT qPCR temperature and cycle profile

| Temperature | Time                                       | Cycles                                       |
|-------------|--------------------------------------------|----------------------------------------------|
| 95°C        | 3 min                                      | 1                                            |
| 95°C        | 15 sec                                     | 40                                           |
| 60°C        | 1 min                                      | (measuring fluorescence<br>after each cycle) |
| 95°C        | continuous heating to obtain melting curve |                                              |
| 40°C        | 1 min                                      | 1                                            |
